# Supplementary material
Source: PubMed Central journal article supplement (PMC2729349)

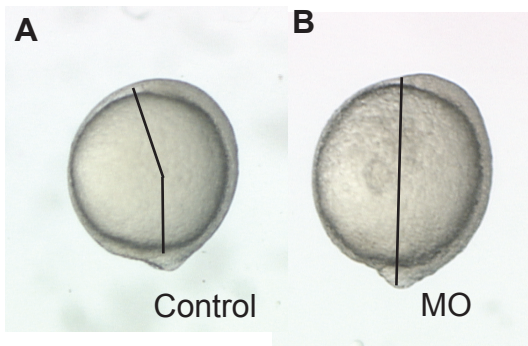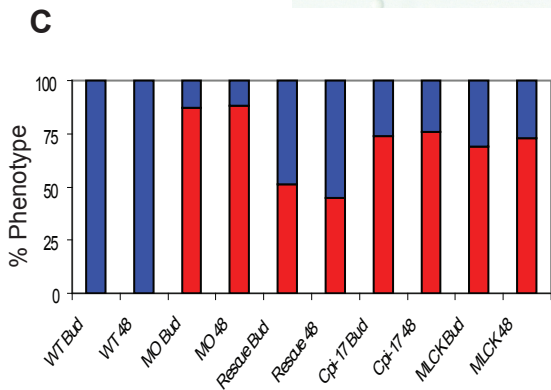

Supplement: supp_136_14_2375__1.pdf [file supp_136_14_2375__1.pdf]

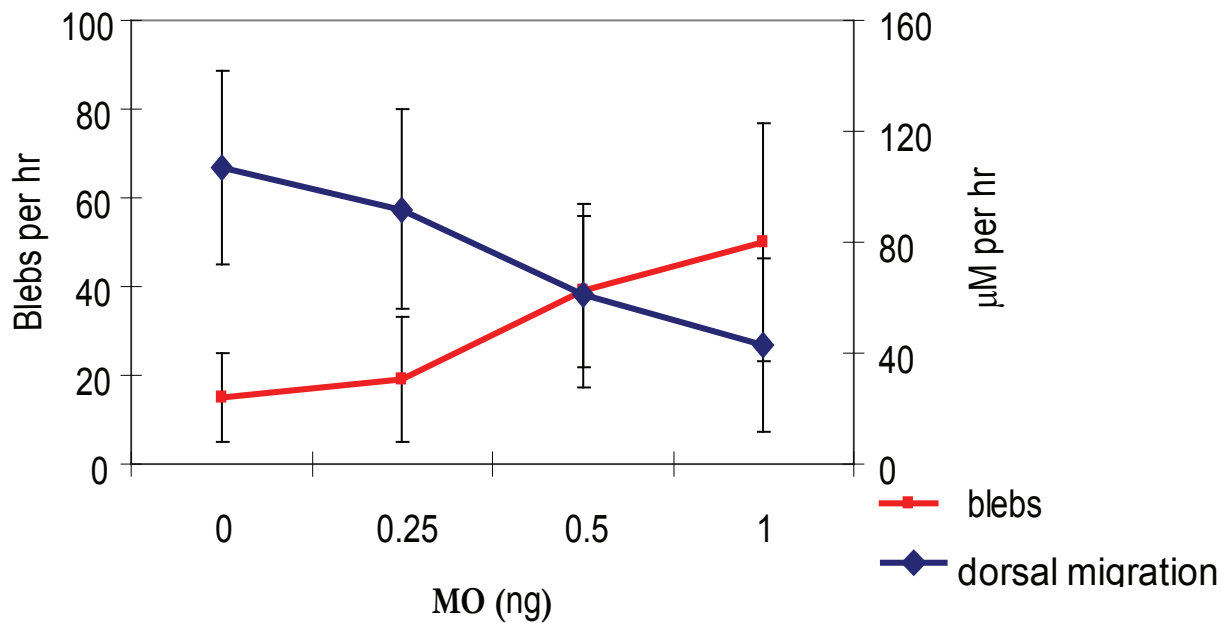

Supplement: supp_136_14_2375__2.pdf [file supp_136_14_2375__2.pdf]
